# Supplementary material for: A protein tertiary structure mimetic modulator of the Hippo signalling pathway
Source: PubMed Central journal article supplement (PMC7591920; doi:10.1038/s41467-020-19224-8), 2020-10-27
Supplement: 41467_2020_19224_MOESM1_ESM.pdf [file 41467_2020_19224_MOESM1_ESM.pdf]

## **Supplementary Information**

### **A protein tertiary structure mimetic modulator of the Hippo signalling pathway**

Hélène Adihou et al.

## 1. Supplementary figures

```
hTEAD1 (209-259) : RSIGTTKLRLVEFSAFLEQQRDPDSYNKHLFVHIGHANHSYSDPLLESVDI
mTEAD4 (209-259) : ...ASS...WML.....R•Q•••T.....SQSSP.....Y••T•••
hTEAD1 (260-310) : YDKFPEKKGGLKELFGKGPQNAFFLVKFWADLNCNIQDDAGAFYGVTSQYE
mTEAD4 (260-310) : .....ER•S.....T•D•E.....S••••
hTEAD1 (311-361) : SSENMTVTCSTKVCSEFGKQVVEKVEYARFENGRFVYRINRSPMCEYMIN
mTEAD4 (311-361) : •P•••II.....Y•••HYL••H••L•••••
hTEAD1 (362-412) : FIHKLKHLPEKYMMNSVLENFTILLVVTNRDTQETLLCMACVFVSNSEHG
mTEAD4 (362-412) : .....Q.....I•Y.....A••••|
hTEAD1 (413-427) : AQHHIYRLVKD
mTEAD4 (413-427) : .....E
```

**Supplementary Figure 1** | Sequence alignment of hTEAD1 and mTEAD4 Yap binding domain. The residues involved in the binding of two-helix motif of VGL4 are shown in bold.

```
hVGL4 ( 1- 47) : -----METPLDVLVSRASLVHADDEKREAALRGEPRMQTLFPVASALSSHRT
mVGL4 ( 1- 52) : MLFMKMDLLNYQYLDKMNNNIGVLCYEG••S.....
hVGL4 ( 48- 99) : GPPPISPSKRKFSEMEPGDEDLDCDNDHVSMSRIFNPHLNKTANGDCRRDPR
mVGL4 ( 53-104) : .....K•••E.....S.....V.....
hVGL4 (100-151) : ERSRSPIERAVAPTMSLHGSHLYTSLPSLQPLALTKNSLDASRPAGLSP
mVGL4 (105-152) : .....A••AV•••G••A.....-M.....S•TG•S•V---
hVGL4 (152-203) : TLTPGERQQNRPSVITCASAGARNCNLSHCPIAHSGCAAPGPASYRRPPSAA
mVGL4 (153-199) : -----S••S.....T
hVGL4 (204-255) : TTCDPVVEEHFRRLGKNYKEPEPAPNSVSITGSVDDHFAKALGDTWLQIKA
mVGL4 (200-251) : A.....
hVGL4 (256-290) : AKDGASSSPESASRRGQPASPSAHMVSHSHSPSVVS
mVGL4 (252-287) : •••S.....T.....
```

**Supplementary Figure 2** | Sequence alignment of the hVGL4 and mVGL4. TEAD binding domain is shown in bold.

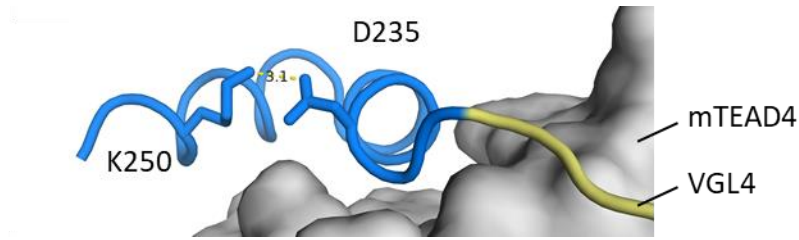

**Supplementary Figure 3** | Two-helix motif of VGL4 (blue) bound to mTEAD4 (grey) (PDB ID: 4LN0). The tertiary structure is stabilized by a salt bridge between K235 and D250.

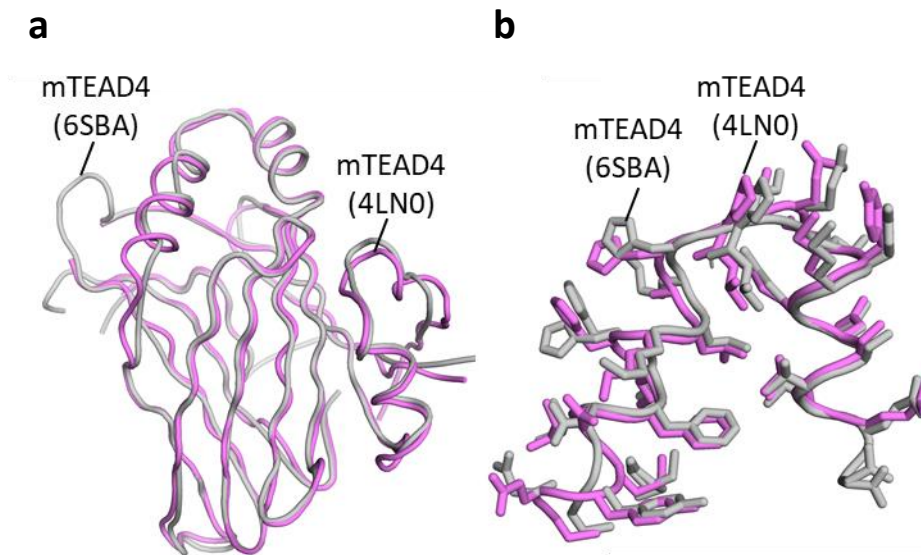

**Supplementary Figure 4** | Comparison of crystal structures of VGL4 and **4E** bound to mTEAD4. (a) Superimposition of mTEAD4 bound to **4E** (in grey, PDB ID: 6SBA) and mTEAD4 bound to VGL4 (in pink, PDB ID: 4LN0). (b) Close-up of TEAD interface targeted by the two-helix motif. Backbone conformation and side chain orientations are similar for VGL4- (pink) and **4E**-bound (grey) mTEAD4.

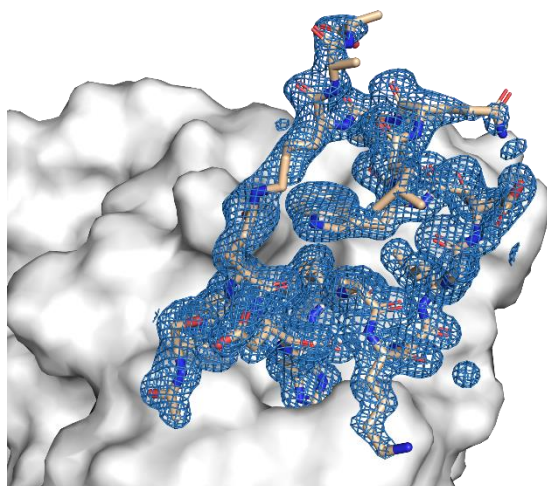

**Supplementary Figure 5** | Portion of the 2Fo-Fc electron density map (blue, contoured at  $\sigma = 1.2$ ) for the crystal structure of VGL4/4E. VGL4 electron density map is represented in grey and 4E electron density map is represented in blue.

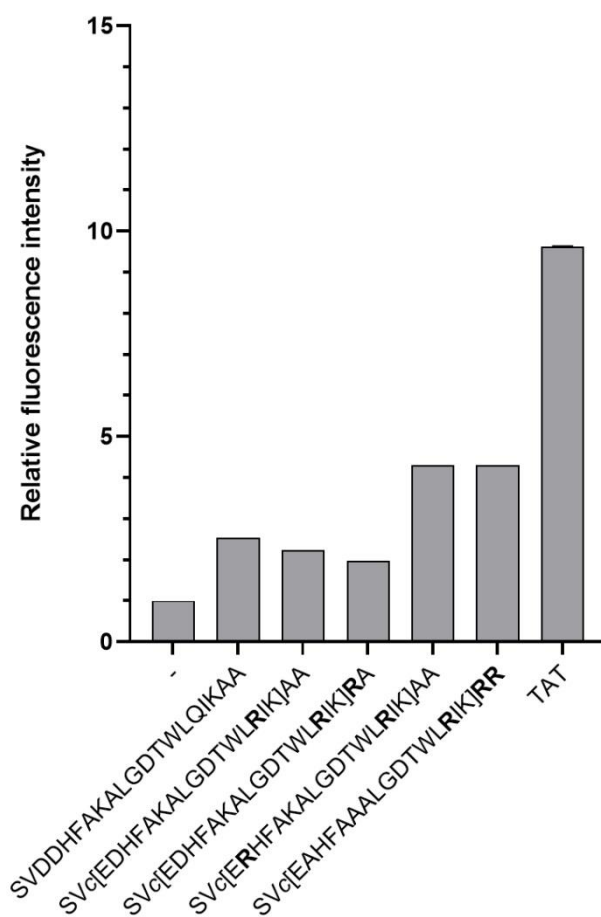

**Supplementary Figure 6** | Cell permeability of FITC labelled arginine rich peptides was assessed by flow cytometry in HeLa cells after 90 minutes incubation at 5  $\mu$ M. The fluorescence intensities are shown relative to DMSO-treated control (-). Source data are provided as a Source Data file.

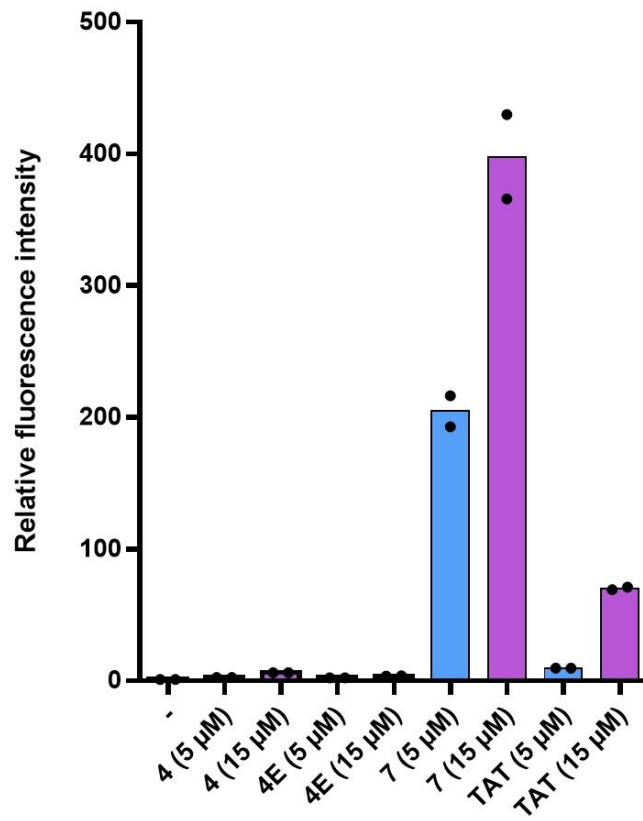

**Supplementary Figure 7** | Cell permeability of FITC labelled **4**, **4E**, **7** and Tat was assessed by flow cytometry in HeLa cells after 90 minutes incubation at 5 μM. The fluorescence intensities are shown relative to DMSO-treated control (-) ( $n = 2$  biological replicates). Source data are provided as a Source Data file.

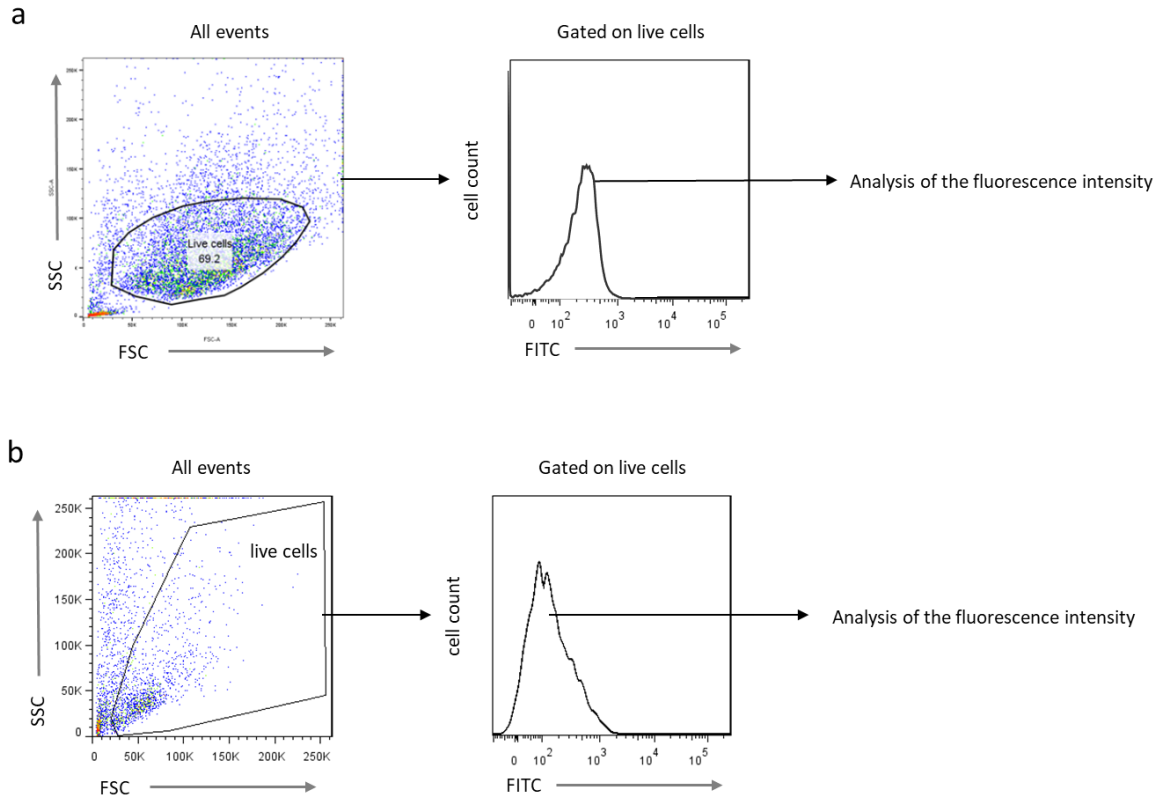

**Supplementary Figure 8** | Gating strategies used for cell sorting. (a) Gating strategy to sort HeLa cells for the characterization of the cellular uptake of FITC-labeled peptides presented on Supplementary Figure 5 and 6. (b) Gating strategy to sort whole heart cells for the characterization of the cellular uptake of FITC-labeled peptides presented on Supplementary Figure 16c.

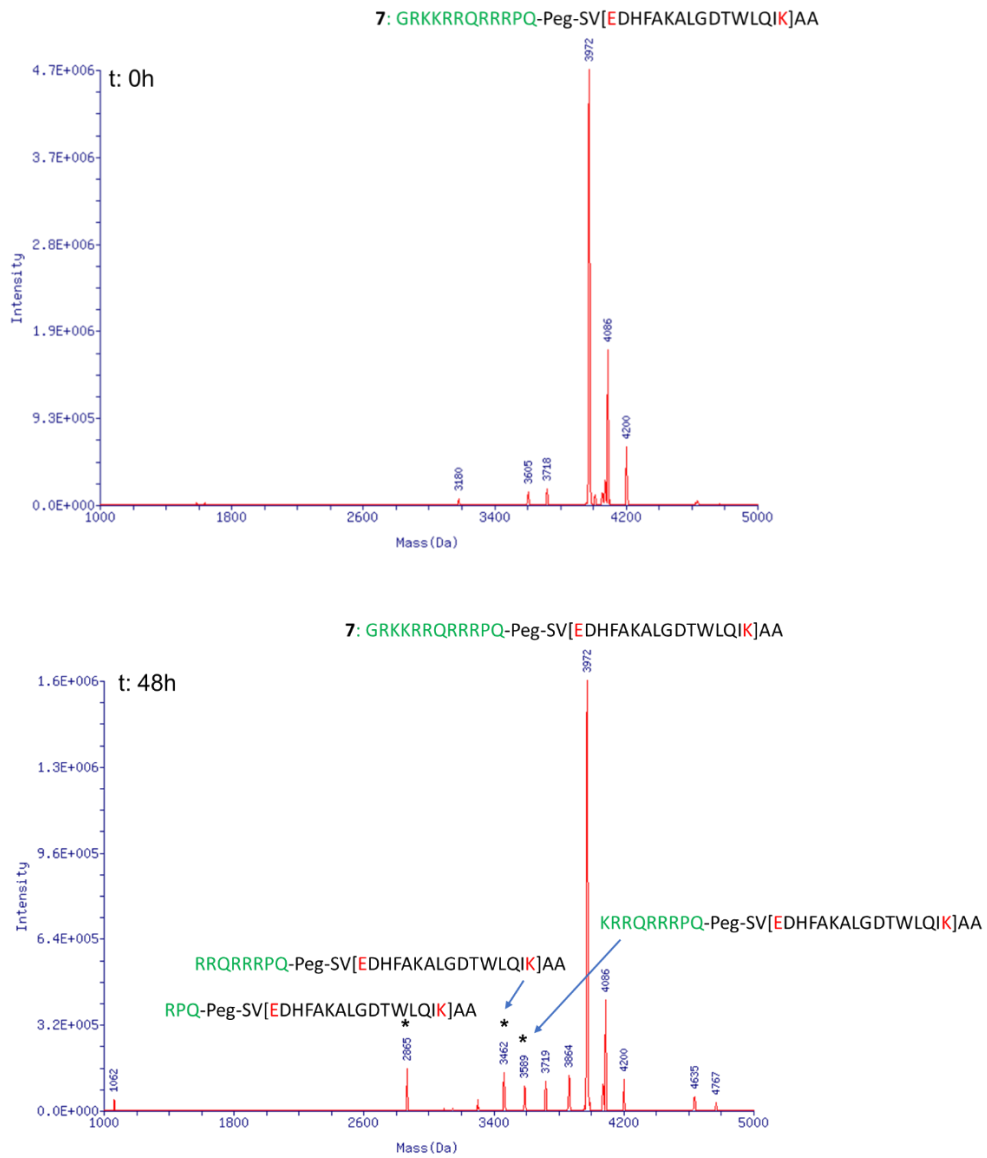

**Supplementary Figure 9** | Proteolytic stability of the peptide 7 (30  $\mu$ M) was evaluated after incubation in cell culture media buffer containing 10% of Fetal Bovine Serum for 48 hours. Deconvolution MS Spectra at 0 h and 48 h were analysed for the identification of the cleavage sites.

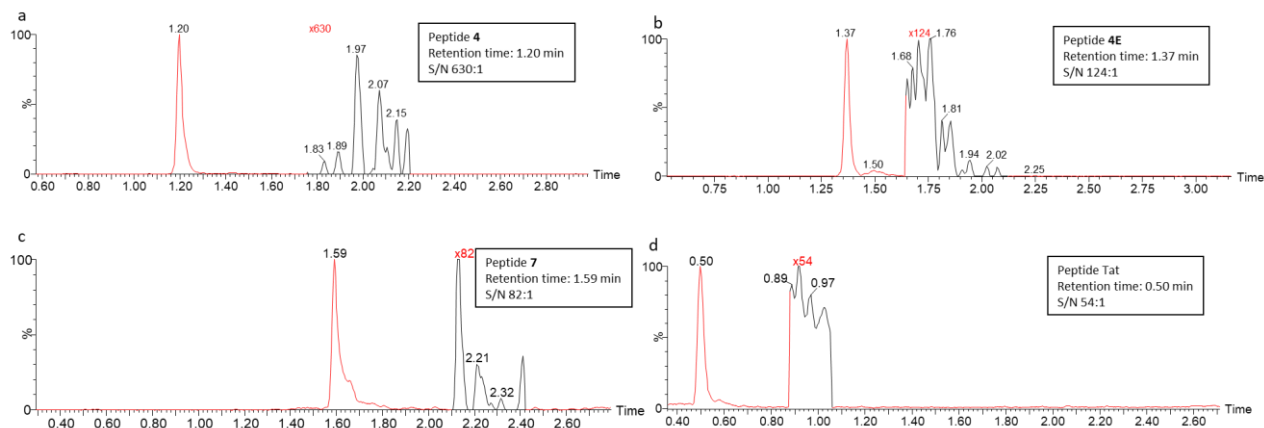

**Supplementary Figure 10** | Representative chromatograms used to determine subcellular concentrations of peptides showing S/N ratio at 50 nM of peptide.

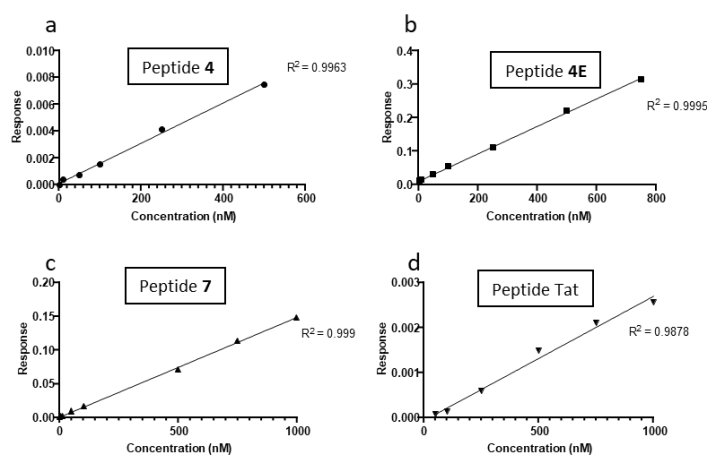

**Supplementary Figure 11** | Representative standard calibration curve of peptides (a) 4, (b) 4E, (c) 7 and (d) Tat used to determine subcellular concentrations of peptides. Source data are provided as a Source Data file.

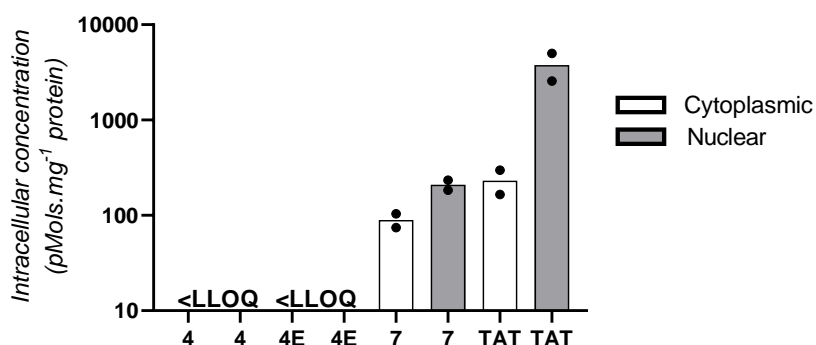

**Supplementary Figure 12** | Intracellular concentration of unlabelled peptides investigated by mass spectrometry (24 hours incubation at  $c(\text{peptide}) = 25 \mu\text{M}$ ). Peptide 4 and peptide 4E have concentrations below the lower limit of quantification (LLOQ), therefore they were not detected. Mean  $\pm$  SEM were plotted for all data for N=2 biological replicates. Source data are provided as a Source Data file.



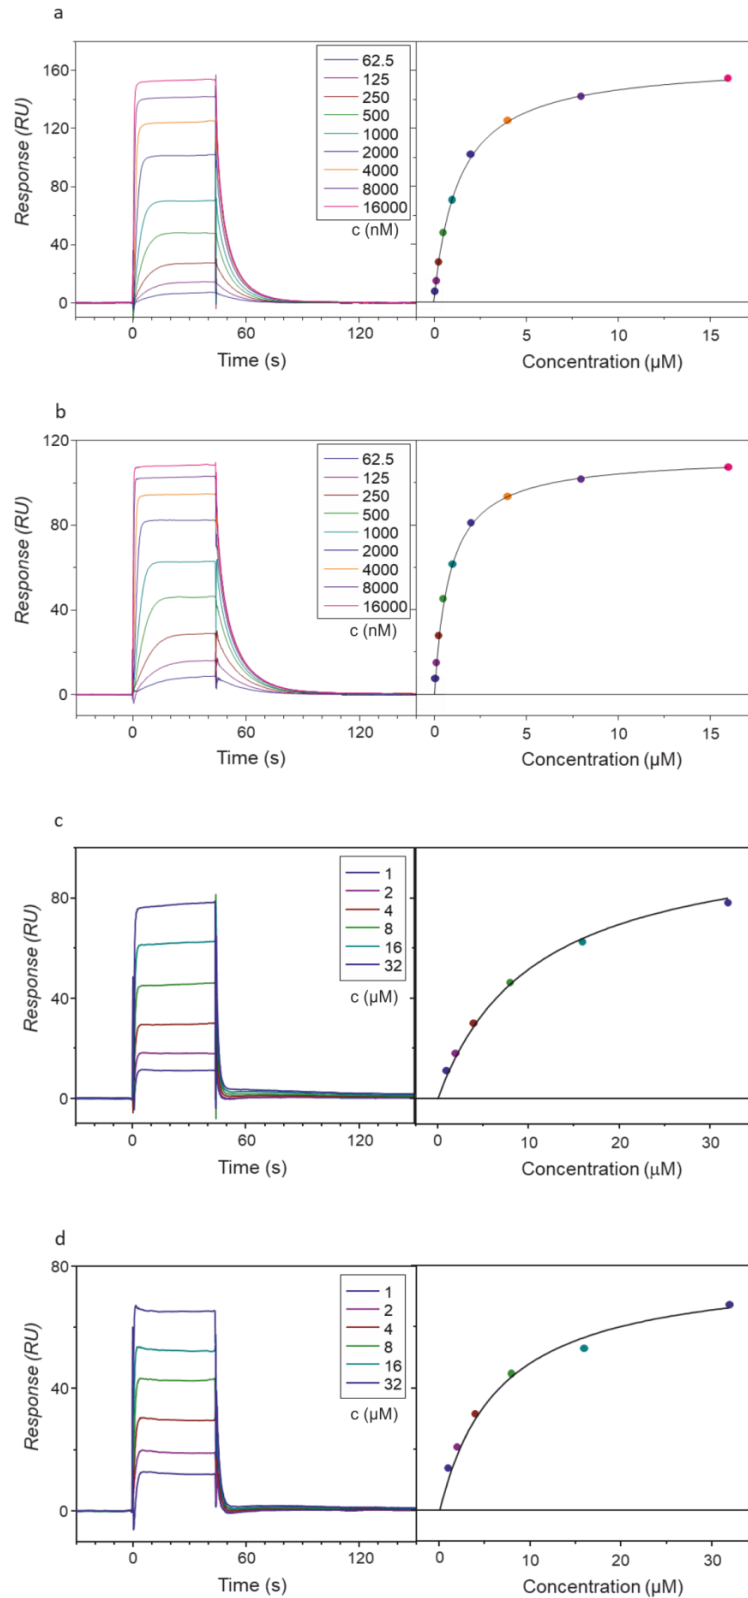

**Supplementary Figure 13** | Surface Plasmon Resonance kinetic analyses to measure affinities of peptide **4E** and peptide **4** for hTEAD1 and mTEAD4. SPR assay was performed in HBS-P(+) at 20°C and a flow-rate of 30  $\mu\text{L}/\text{min}$ . hTEAD1 has been tethered to a CM5 sensor via amine-coupling using 10 mM MES pH 6.4 during coupling. Representative sensorgrams and saturation binding curves fitted with 1:1 binding model for (a) peptide **4E** to hTEAD1 ( $K_d = 0.70 \pm 0.05 \mu\text{M}$ ), (b) peptide **4E** to mTEAD4 ( $K_d = 1.2 \pm 0.1 \mu\text{M}$ ), (c) peptide **4** to hTEAD1 ( $K_d = 0.83 \pm 0.78 \mu\text{M}$ ), (d) peptide **4** to mTEAD4 ( $K_d = 1.5 \pm 1.0 \mu\text{M}$ ). Source data are provided as a Source Data file.

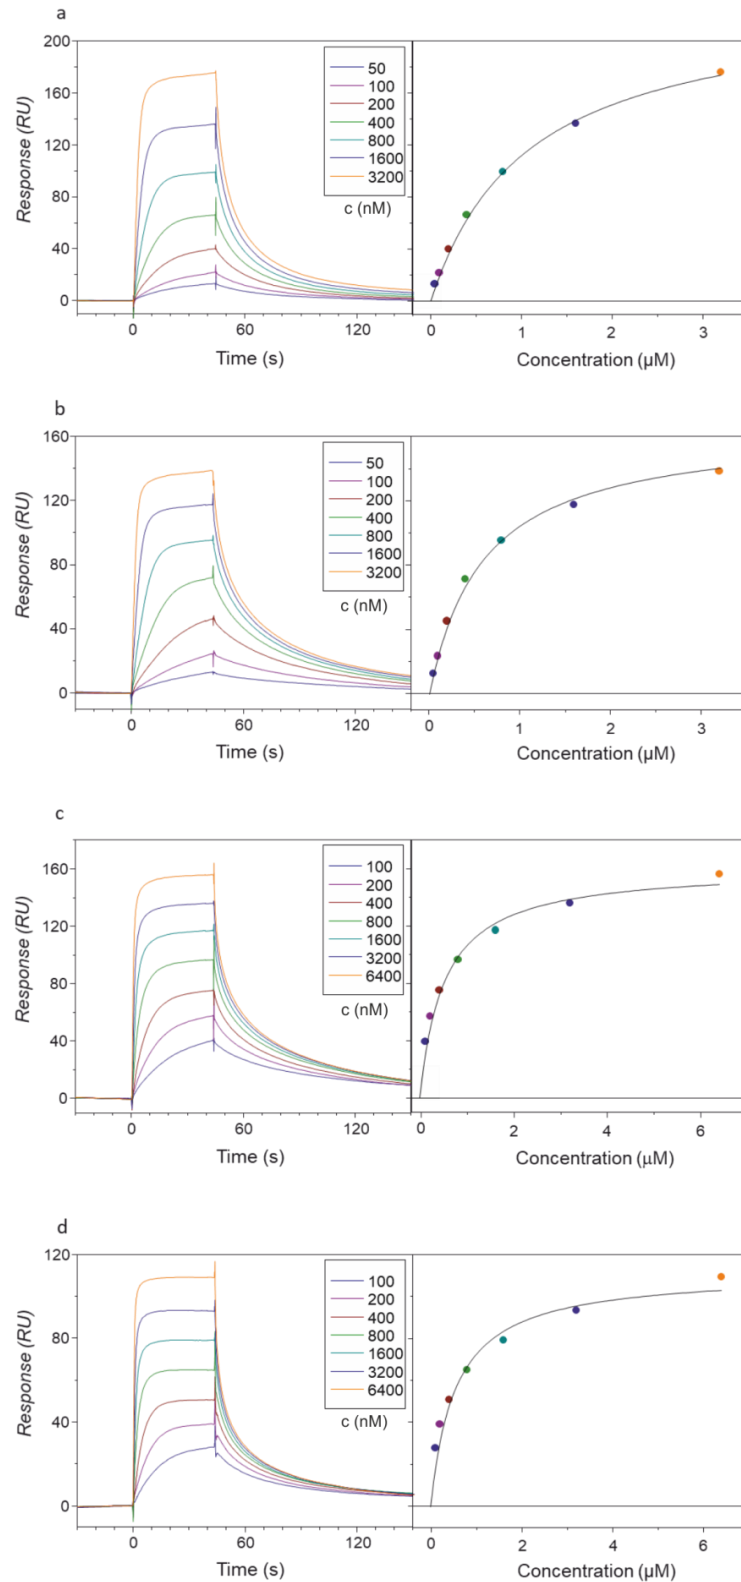

**Supplementary Figure 14** | Surface Plasmon Resonance kinetic analyses to measure affinities of YAP and VGL4 for hTEAD1 and mTEAD4. SPR assay was performed in HBS-P(+) at 20°C and a flow-rate of 30  $\mu\text{L}/\text{min}$ . hTEAD1 has been tethered to a CM5 sensor via amine-coupling using 10 mM MES pH 6.4 during coupling. Representative sensorgrams and saturation binding curves fitted with steady state affinity model for (a) YAP to hTEAD1 ( $K_d=1.8 \mu\text{M}$ ), (b) YAP to mTEAD4 ( $K_d=0.7 \mu\text{M}$ ), (c) VGL4 to hTEAD1 ( $K_d=4.3 \mu\text{M}$ ), (d) VGL4 to mTEAD4 ( $K_d=3.1 \mu\text{M}$ ). Mean  $\pm$  SEM of triplicates were plotted for all data. Source data are provided as a Source Data file.

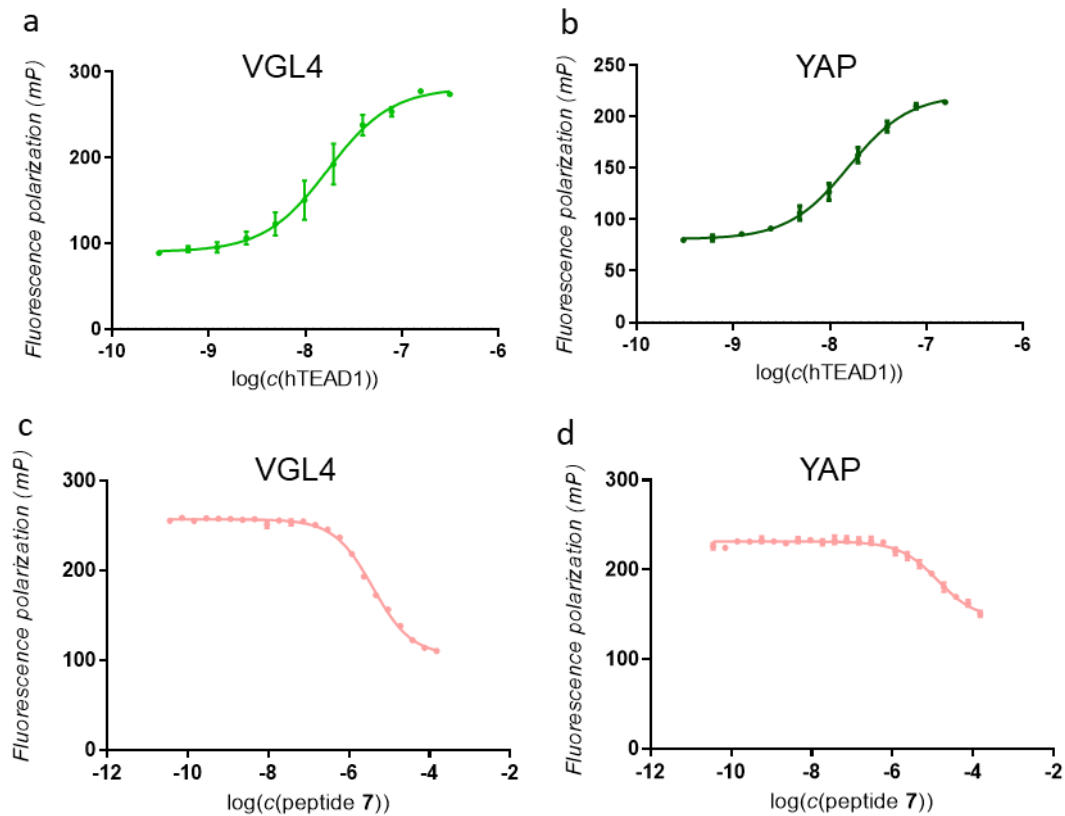

**Supplementary Figure 15** | Binding studies of hTEAD1 by fluorescence polarization. Dissociation constants were measured with FITC labelled VGL4 and YAP. The fluorescent cofactor (10 nM) are directly titrated with hTEAD1. After 1 hour of incubation, fluorescence polarization was measured, and a non-linear fitting was applied to the curves to determine the dissociation constants (a)  $K_d$  of FITC-VGL4=  $17.0 \pm 2.5$  nM (b)  $K_d$  of FITC-YAP =  $15.5 \pm 1.4$  nM. In the competitive binding assay, first a complex with the fluorescent cofactor (10 nM) and hTEAD1 (100 nM) was formed and after 1 hour of incubation, the unlabelled peptide was titrated. After 1 hour of incubation, fluorescence polarization was measured, and a non-linear fitting was applied to the curves to determine the half maximal inhibitory concentration. (c) Competition assay with labelled VGL4 and **7** as competitor ( $IC_{50} = 5.46 \pm 0.25$   $\mu\text{M}$ ). (d) Competition assay with labelled YAP and **7** as competitor ( $IC_{50} = 87.7 \pm 7.2$   $\mu\text{M}$ ). Mean  $\pm$  SEM of triplicates were plotted for all data. Source data are provided as a Source Data file.

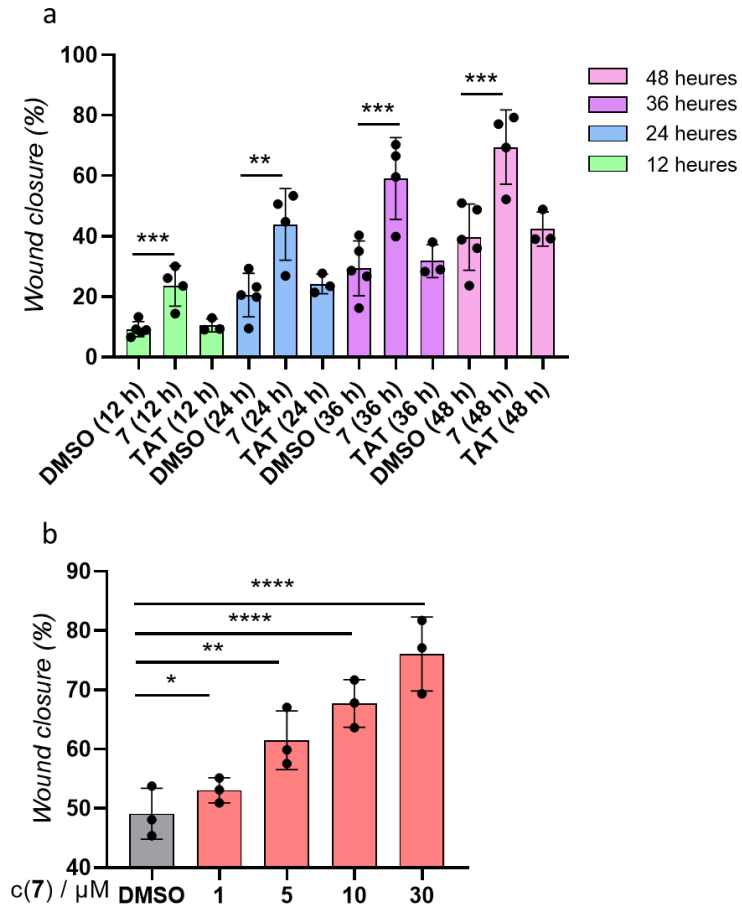

**Supplementary Figure 16** | (a) Time-dependent Wound Healing Assay in RKO cells treated with peptide **7**. After the wound formation, RKO cells were incubated with **7** ( $c = 30 \mu\text{M}$ , cell front after 48 hours of incubation). (b) Dose-dependent Wound Healing Assay with RKO cells treated with peptide **7**. After the wound formation, RKO cells were incubated with **7** ( $c = 1, 5, 10$  and  $30 \mu\text{M}$ ) for 48 h of incubation. Number of independent biological replicates:  $n = 3$ , error bars = SEM. For all the experiments, statistical significances were determined by Student's paired t test.  $P < 0.05$  was considered statistically significant ( $p < 0.05 = *$ ;  $p < 0.01 = **$ ;  $p < 0.001 = ***$ ;  $p < 0.0001 = ****$ ) and source data are provided as a Source Data file.

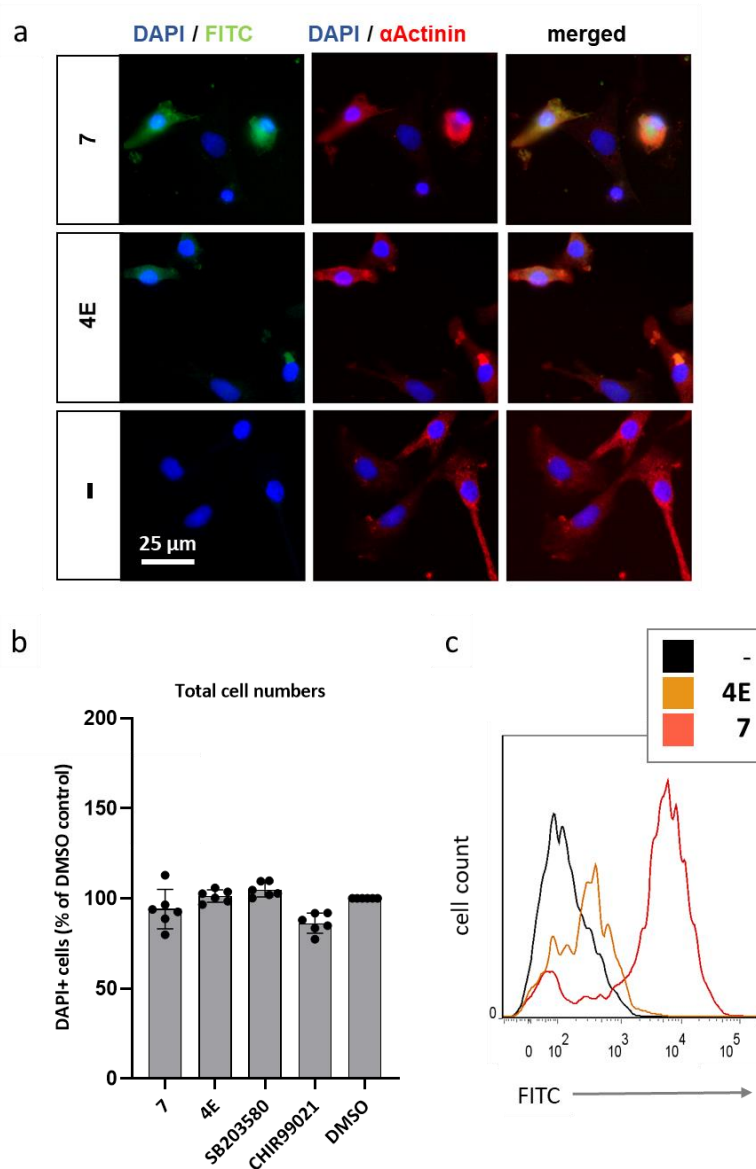

**Supplementary Figure 17** | (a) Representative micrographs supporting the cellular uptake of FITC-labelled **7** and **4E** in whole heart cells monitored by fluorescence microscopy after 90 minutes treatments (scale bar: 25  $\mu$ m), number of technical replicates: N = 3, number of independent biological replicates: n = 1; (b) Cell toxicity assessment of peptides **7** and **4E** as well as control compounds (SB203580, CHIR99021) on rat heart cells in culture (c(peptide) = 10  $\mu$ M). Number of independent biological replicates: n = 6, error bars = SEM. (c) Cellular uptake of FITC-labelled peptides **7** and **4E** by flow cytometry analysis of live cells after 90 min incubation at 5  $\mu$ M: Representative histogram plot, (-) DMSO control). Source data are provided as a Source Data file.

a DAPI/YAP/ $\alpha$ Actinin

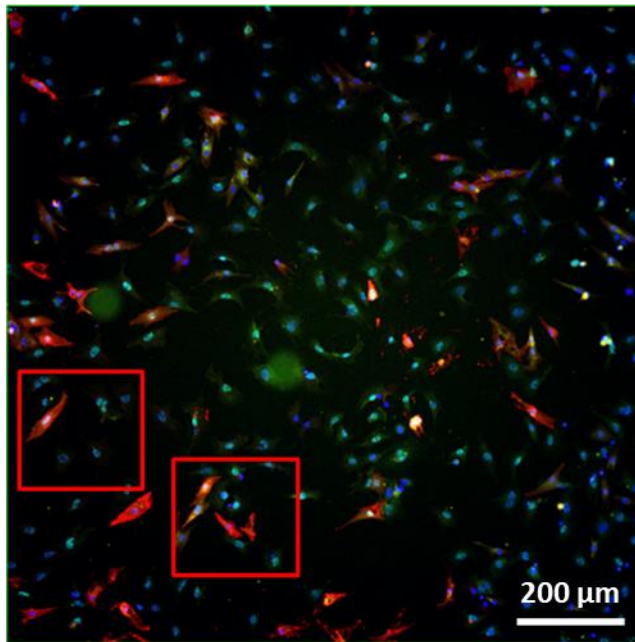

b DAPI/YAP/ $\alpha$ Actinin DAPI/YAP YAP

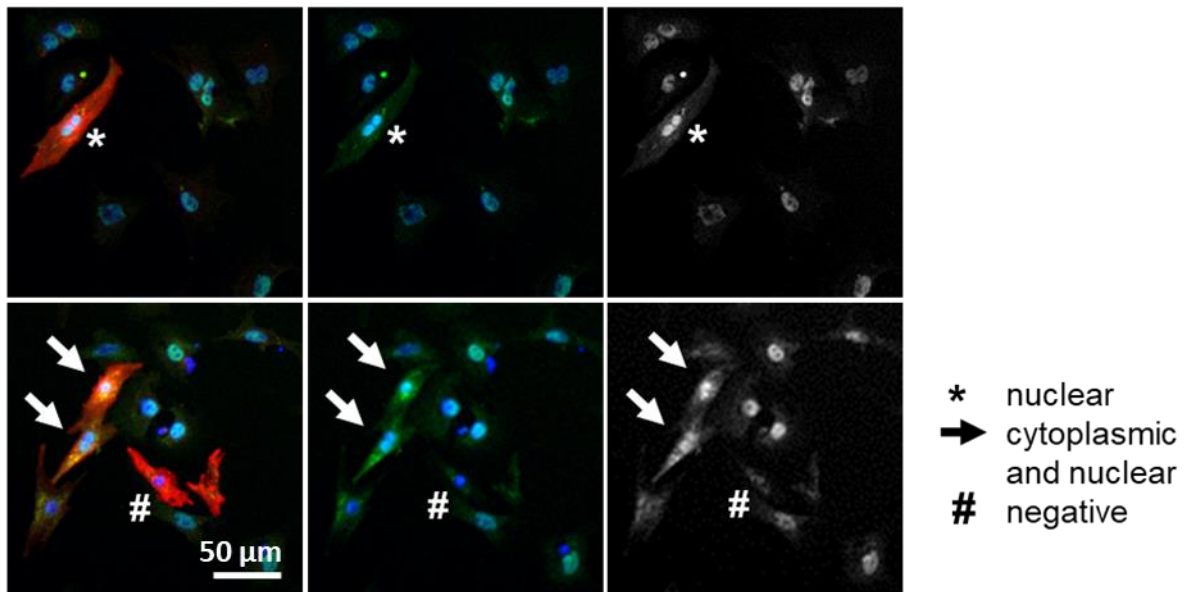

**Supplementary Figure 18** | Analysis of sub-cellular distribution of YAP in cardiomyocytes after treatment.

(a) Representative fluorescence images showing the different localization of YAP (green) in cardiomyocytes (red), .Scale bar: 200  $\mu$ m (lower magnification photography). (b) Optical section of the red rectangles with (\*) labels a cardiomyocyte showing nuclear YAP staining, (→) label cardiomyocytes showing YAP localized in the nucleus and in the cytoplasm, and (#) labels a cardiomyocyte negative for YAP staining. Scale bar = 50  $\mu$ m. Number of independent biological replicates: n = 2.

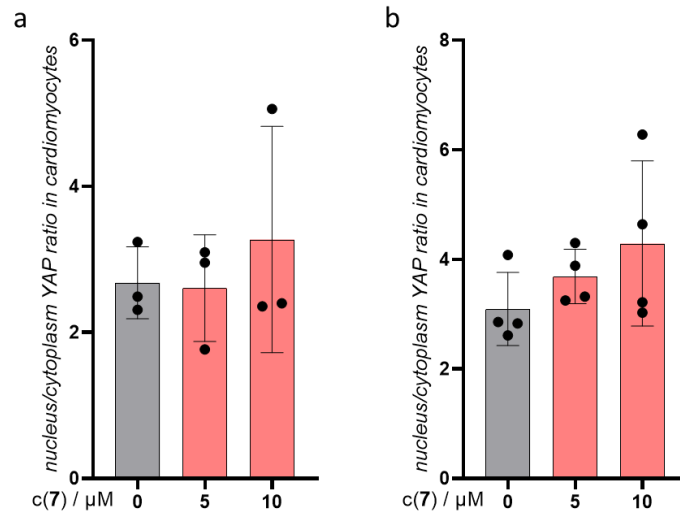

**Supplementary Figure 19** | Analysis of sub-cellular distribution of YAP in cardiomyocytes after treatment. The graphs depict nuclear to cytoplasmic YAP ratio in cardiomyocytes (a) 8 hours and (b) 24 h after treatment. YAP is detected by fluorescence immunocytochemistry. Fluorescence intensity is quantified in the specific cell compartments and analyzed ( $n = 3-4$  biologically independent replicates; error bars represent SEM). Source data are provided as a Source Data file.

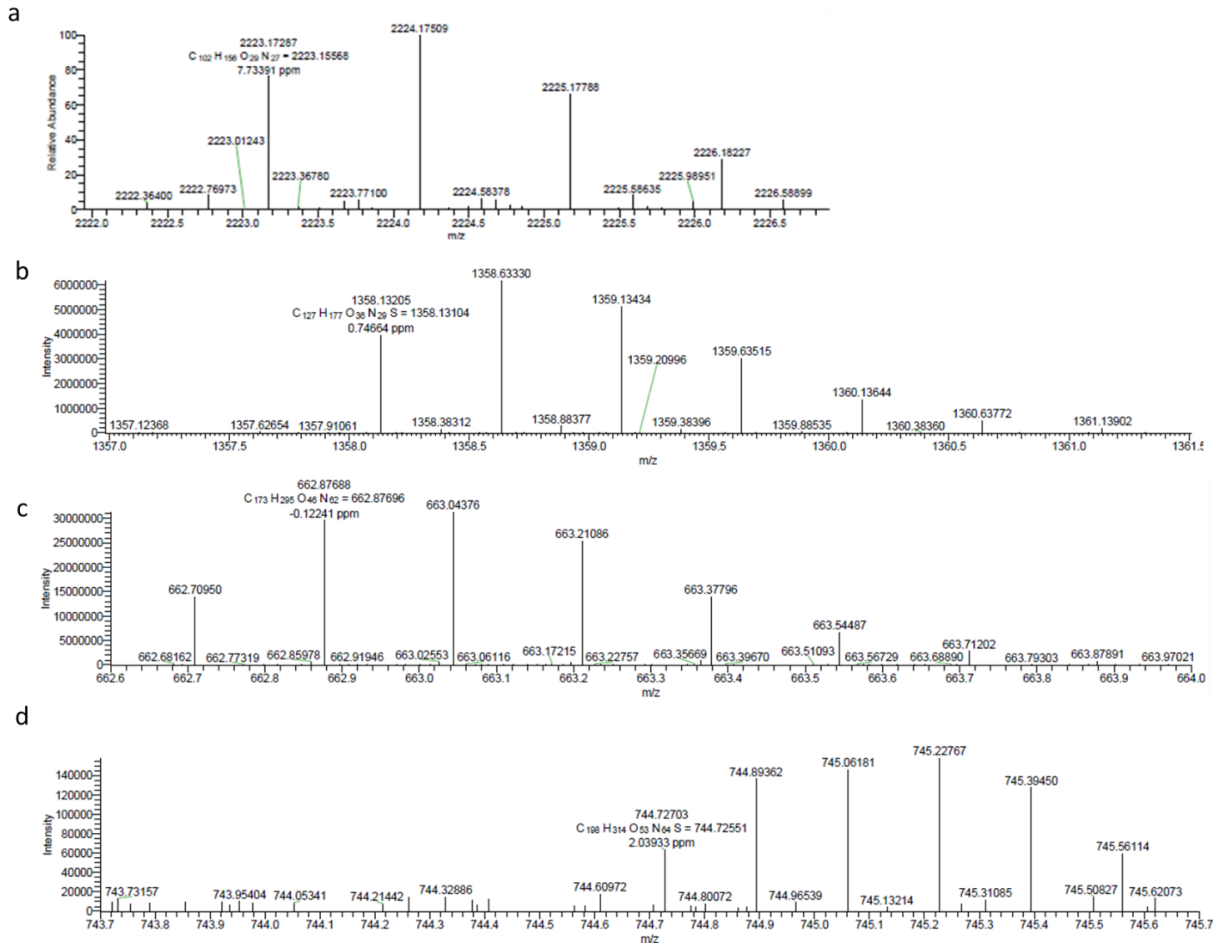

**Supplementary Figure 20** | Analytical characterization of peptide **4E** and peptide **7**. (a) High resolution mass spectrometry of acetylated peptide **4E**. HRMS (m/z):  $[M+H]^+$  calcd. for  $C_{102}H_{156}N_{29}O_{27}$ , 2223.1557; found, 2223.1729. (b) High resolution mass spectrometry of FITC labelled peptide **4E**. HRMS (m/z):  $[M+2H]^{2+}$  calcd. for  $C_{127}H_{177}N_{36}O_{29}S$ , 1358.1310; found, 1358.1320. (c) High resolution mass spectrometry of acetylated peptide **7**. HRMS (m/z):  $[M+6H]^{6+}$  calcd. for  $C_{173}H_{295}N_{64}O_{62}$ , 662.8769; found, 662.8769. (d) High resolution mass spectrometry of FITC labelled peptide **7**. HRMS (m/z):  $[M+6H]^{6+}$  calcd. for  $C_{198}H_{314}N_{64}O_{53}S$ , 744.7255; found, 744.7270.



## 2. Supplementary tables

**Supplementary Table 1:** Sequences of the linear peptide precursors including  $K_d$ -values as obtained by SPR with either mTEAD4 or hTEAD1.

|                 | Amino acid sequence  | mTEAD4<br>$K_d/ \mu\text{M}$ | hTEAD1<br>$K_d/ \mu\text{M}$ |
|-----------------|----------------------|------------------------------|------------------------------|
| <b>4</b>        | SVDDHFAKALGDTWLQIKAA | 3.1                          | 4.3                          |
| <b>4E(open)</b> | SVEDHFAKALGDTWLQIKAA | 2.4                          | 3.1                          |
| <b>9</b>        | SVDDHFAKALGDTWLQIOAA | 3.2                          | 4.1                          |
| <b>10</b>       | SVEDHFAKALGDTWLQIOAA | 4.2                          | 5.7                          |
| <b>11</b>       | SVDDHFAKALGDTWLQIBAA | 5.3                          | 5.5                          |
| <b>12</b>       | SVEDHFAKALGDTWLQIBAA | 1.4                          | 1.7                          |
| <b>13</b>       | SVDDHFAKALGDTWLQIAAA | 12                           | 17                           |

**Supplementary Table 2:** Crystallographic data collection and refinement statistics for complex of 4E and mTEAD4 (PDB ID: 6SBA) <sup>a</sup>Values in parentheses represent the highest resolution shell.

| <b>Data collection</b>                               |                                                |
|------------------------------------------------------|------------------------------------------------|
| Space group                                          | P 2 <sub>1</sub> 2 <sub>1</sub> 2 <sub>1</sub> |
| Cell dimensions                                      |                                                |
| <i>a</i> , <i>b</i> , <i>c</i> (Å)                   | 56.5, 65.11, 74.91                             |
| $\alpha$ , $\beta$ , $\gamma$ (°)                    | 90.00, 90.00, 90.00                            |
| Resolution (Å)                                       | 49.14-1.30 (1.33-1.30) <sup>a</sup>            |
| <i>R</i> <sub>sym</sub> or <i>R</i> <sub>merge</sub> | 9.8 (305.7)                                    |
| <i>I</i> / $\sigma$ <i>I</i>                         | 11.96 (0.85)                                   |
| Completeness (%)                                     | 97.9 (96.1)                                    |
| Redundancy                                           | 13.3 (13.04)                                   |
| <b>Refinement</b>                                    |                                                |
| Resolution (Å)                                       | 49.1-1.34                                      |
| No. reflections                                      | 67170                                          |
| <i>R</i> <sub>work</sub> / <i>R</i> <sub>free</sub>  | 15.1/17.5                                      |
| No. atoms                                            |                                                |
| Protein                                              | 2073                                           |
| Ligand/ion                                           | 115                                            |
| Water                                                | 134                                            |
| <i>B</i> -factors                                    |                                                |
| Protein                                              | 36.84                                          |
| Ligand/ion                                           |                                                |
| Water                                                | 47.5                                           |
| R.m.s. deviations                                    |                                                |
| Bond lengths (Å)                                     | 0.024                                          |
| Bond angles (°)                                      | 2.028                                          |

**Supplementary Table 3:** Alanine scan,  $K_d$ -values were determined by SPR using either mTEAD4 or hTEAD1. In addition,  $IC_{50}$ -values based on competition fluorescence polarization are given.

|    | Amino acid sequence      | hTEAD1<br>$K_d/ \mu\text{M}$ | mTEAD4<br>$K_d/ \mu\text{M}$ | mTEAD4<br>$IC_{50}/ \mu\text{M}$ |
|----|--------------------------|------------------------------|------------------------------|----------------------------------|
| 14 | AVc[EDHFAKALGDTWLQIK]AA  | $1.5 \pm 0.020$              | $2.7 \pm 0.25$               | $6.1 \pm 4.3$                    |
| 15 | SAc[EDHFAKALGDTWLQIK]AA  | $1.0 \pm 0.37$               | $1.5 \pm 0.37$               | $2.1 \pm 0.56$                   |
| 16 | SVc[EAHFAKALGDTWLQIK]AA  | $0.74 \pm 0.46$              | $1.6 \pm 0.69$               | $3.0 \pm 0.76$                   |
| 17 | SVc[EDHFAKALGDTWLQIK]AA  | >100                         | >100                         | >100                             |
| 18 | SVc[EDHAAKALGDTWLQIK]AA  | >100                         | >100                         | >50                              |
| 19 | SVc[EDHFAAALGDTWLQIK]AA  | $1.7 \pm 0.010$              | $2.8 \pm 0.060$              | $0.28 \pm 0.090$                 |
| 20 | SVc[EDHFAKAAAGDTWLQIK]AA | >100                         | >100                         | >100                             |
| 21 | SVc[EDHFAKALGATWLQIK]AA  | >100                         | >100                         | >100                             |
| 22 | SVc[EDHFAKALGDAWLQIK]AA  | $91 \pm 14$                  | $113 \pm 3.5$                | >100                             |
| 23 | SVc[EDHFAKALGDTALQIK]AA  | $7.8 \pm 0.15$               | $15 \pm 0.85$                | >50                              |
| 24 | SVc[EDHFAKALGDTWAQIK]AA  | $1.1 \pm 0.06$               | $2.0 \pm 0.14$               | $0.10 \pm 0.01$                  |
| 25 | SVc[EDHFAKALGDTWLAIK]AA  | $0.75 \pm 0.12$              | $1.3 \pm 0.11$               | $0.060 \pm 0.010$                |
| 26 | SVc[EDHFAKALGDTWLQAK]AA  | $2.7 \pm 1.07$               | $4.4 \pm 1.35$               | $7.4 \pm 6.1$                    |

**Supplementary Table 4:** Sequences and overall charges of the peptides to investigate the influence of arginine content in cellular uptake.

|            | Amino acid sequence                      | Charge |
|------------|------------------------------------------|--------|
| <b>4</b>   | SVDDHFAKALGDTWLQIKAA                     | -1     |
| <b>4E</b>  | SVc[EDHFAKALGDTWLQIK]AA                  | -1     |
| <b>27</b>  | SVc[EDHFAKALGDTWLRIK]AA                  | 0      |
| <b>28</b>  | SVc[EDHFAKALGDTWLRIK]RA                  | +1     |
| <b>29</b>  | SVc[EAHFAAALGDTWLRIK]RR                  | +2     |
| <b>7</b>   | GRKKRRQRRRPQ-Peg-SVc[EDHFAKALGDTWLQIK]AA | +7     |
| <b>Tat</b> | GRKKRRQRRRPQ                             | +8     |

**Supplementary Table 5:** Dissociation constant ( $K_d$ ) of peptides **4E** and **7** evaluated by SPR and FP

|           | Amino acid sequence                     | SPR                          |                              | FP                           |                              |
|-----------|-----------------------------------------|------------------------------|------------------------------|------------------------------|------------------------------|
|           |                                         | hTEAD1<br>$K_d/ \mu\text{M}$ | mTEAD4<br>$K_d/ \mu\text{M}$ | hTEAD1<br>$K_d/ \mu\text{M}$ | mTEAD4<br>$K_d/ \mu\text{M}$ |
| <b>4E</b> | SV[EDHFAKALGDTWLQIK]AA                  | $0.70 \pm 0.05$              | $1.2 \pm 0.4$                | $0.168 \pm 0.037$            | $0.032 \pm 0.005$            |
| <b>7</b>  | GRKKRRQRRRPQ-Peg-SV[EDHFAKALGDTWLQIK]AA | $0.83 \pm 0.78$              | $1.5 \pm 1.0$                | $0.147 \pm 0.07$             | $0.051 \pm 0.005$            |

**Supplementary Table 6:** Dissociation constant ( $K_d$ ) of VGL4(203 – 256) and YAP(50 – 100) evaluated by SPR and FP

| Cofactor | SPR                       |                           | FP                   |                      |
|----------|---------------------------|---------------------------|----------------------|----------------------|
|          | hTEAD1<br>$K_d$ / $\mu$ M | mTEAD4<br>$K_d$ / $\mu$ M | hTEAD1<br>$K_d$ / nM | mTEAD4<br>$K_d$ / nM |
| VGL4     | 1.4                       | 2.0                       | 17.0 $\pm$ 2.5       | 9.2 $\pm$ 0.6        |
| YAP      | 1.8                       | 0.7                       | 15.5 $\pm$ 1.4       | 6.4 $\pm$ 0.4        |

**Supplementary Table 7:**  $IC_{50}$ -values for the inhibition of complex between hTEAD1 and a cofactor with peptide 7 determined by competitive fluorescence polarisation assay.

|           | VGL4<br>$IC_{50}$ / $\mu$ M | YAP<br>$IC_{50}$ / $\mu$ M |
|-----------|-----------------------------|----------------------------|
| Peptide 7 | 5.465 $\pm$ 0.253           | 87.7 $\pm$ 7.241           |

**Supplementary Table 8:** MS settings for peptide and standard quantification.

| Compound   | Mode    | Parent ion | Daughter ion | Charge state | Dwell | Cone Voltage | Collision Energy |
|------------|---------|------------|--------------|--------------|-------|--------------|------------------|
| Peptide 4  | ESI +ve | 743.0      | 83.6         | 3H+          | 0.162 | 30           | 35               |
| Peptide 7  | ESI +ve | 663.0      | 110.0        | 6H+          | 0.162 | 30           | 35               |
| Peptide 4E | ESI +ve | 1112.0     | 159.0        | 2H+          | 0.162 | 35           | 55               |
| Tat        | ESI +ve | 333.4      | 70.0         | 5H+          | 0.162 | 30           | 35               |
| Clozapine  | ESI +ve | 327.1      | 270.1        | 1H+          | 0.162 | 30           | 35               |

**Supplementary Table 9:** Media concentrations pre incubation

| Compound   | Media Concentration pre incubation / $\mu$ M |
|------------|----------------------------------------------|
| Peptide 4  | 11.5                                         |
| Peptide 7  | 22.4                                         |
| Peptide 4E | 19.0                                         |
| Tat        | 22.4                                         |

**Supplementary Table 10:** Total drug content in RKO cells on incubation of 25  $\mu$ M compound for 90 minutes.

| Compound   | Measured Concentration / nM | Dilution Factor | nMol                       | pMol.mg <sup>-1</sup> |
|------------|-----------------------------|-----------------|----------------------------|-----------------------|
| Peptide 4  | 1133.521 $\pm$ 133.393      | 10              | 1.7002815 $\pm$ 0.2000895  | 1685.1 $\pm$ 246.5    |
| Peptide 7  | 122.09 $\pm$ 7.277          | 10              | 0.183135 $\pm$ 0.010915    | 183 $\pm$ 53.3        |
| Peptide 4E | 17.2065 $\pm$ 0.8045        | 10              | 0.02580975 $\pm$ 0.0109155 | 424.4 $\pm$ 33.7      |
| Tat        | 478.752 $\pm$ 163.021       | 10              | 0.718128 $\pm$ 0.010915    | 882.5 $\pm$ 319.5     |

**Supplementary Table 11:** Total drug content in RKO cells on incubation of 25  $\mu$ M compound for 24 hours. (LLOQ: lower limit of quantification)

| Compound   | Measured Concentration / nM | Dilution Factor | nMol                      | pMol.mg <sup>-1</sup> |
|------------|-----------------------------|-----------------|---------------------------|-----------------------|
| Peptide 4  | 322.145 $\pm$ 33.657        | 10              | 0.4832175 $\pm$ 0.0504855 | 331.25 $\pm$ 86.85    |
| Peptide 7  | 91.646 $\pm$ 61.816         | 10              | 0.137469 $\pm$ 0.092724   | 127.1 $\pm$ 102.1     |
| Peptide 4E | <LLOQ                       | 10              | <LLOQ                     | <LLOQ                 |
| Tat        | 1797.357 $\pm$ 596.21       | 10              | 2.6960355 $\pm$ 0.894315  | 1647 $\pm$ 647        |

**Supplementary Table 12:** Sub-cellular drug content in RKO cells on incubation of 25  $\mu$ M compound for 90 minutes. (LLOQ: lower limit of quantification)

| Compound   | Sub-cellular compartment | Measured concentration / nM | Dilution Factor | nMol                      | pMol.mg <sup>-1</sup> |
|------------|--------------------------|-----------------------------|-----------------|---------------------------|-----------------------|
| Peptide 4  | Cytoplasm                | <LLOQ                       | 10              | <LLOQ                     | <LLOQ                 |
|            | Nuclear                  | <LLOQ                       | 10              | <LLOQ                     | <LLOQ                 |
| Peptide 7  | Cytoplasm                | 265.5865 $\pm$ 102.9805     | 2               | 0.07967595 $\pm$ 0.030894 | 89.2 $\pm$ 14.9       |
|            | Nuclear                  | 123.5385 $\pm$ 6.5745       | 10              | 0.18530775 $\pm$ 0.009862 | 231.15 $\pm$ 65.95    |
| Peptide 4E | Cytoplasm                | <LLOQ                       | 10              | <LLOQ                     | <LLOQ                 |
|            | Nuclear                  | <LLOQ                       | 10              | <LLOQ                     | <LLOQ                 |
| Tat        | Cytoplasm                | 91.363 $\pm$ 8.748          | 10              | 0.1370445 $\pm$ 0.013122  | 209 $\pm$ 25          |
|            | Nuclear                  | 416.901 $\pm$ 142.802       | 10              | 0.6253515 $\pm$ 0.625352  | 3777.5 $\pm$ 1210.5   |

**Supplementary Table 13:** Sub-cellular drug content in RKO cells on incubation of 25  $\mu$ M compound for 24 hours. (LLOQ: lower limit of quantification)

| Compound   | Sub-cellular compartment | Measured concentration / nM | Dilution Factor | nMol                      | pMol.mg <sup>-1</sup> |
|------------|--------------------------|-----------------------------|-----------------|---------------------------|-----------------------|
| Peptide 4  | Cytoplasm                | <LLOQ                       | 10              | <LLOQ                     | <LLOQ                 |
|            | Nuclear                  | <LLOQ                       | 10              | <LLOQ                     | <LLOQ                 |
| Peptide 7  | Cytoplasm                | 155.914 $\pm$ 40.331        | 2               | 0.0467742 $\pm$ 0.0120993 | 48.75 $\pm$ 24.55     |
|            | Nuclear                  | 202.161 $\pm$ 23.082        | 2               | 0.0606483 $\pm$ 0.0069246 | 243.25 $\pm$ 93.25    |
| Peptide 4E | Cytoplasm                | <LLOQ                       | 10              | <LLOQ                     | <LLOQ                 |
|            | Nuclear                  | <LLOQ                       | 10              | <LLOQ                     | <LLOQ                 |
| Tat        | Cytoplasm                | 98.42 $\pm$ 12.91           | 10              | 0.14763 $\pm$ 0.01936     | 109 $\pm$ 7           |
|            | Nuclear                  | 656.841 $\pm$ 162.534       | 10              | 0.9852615 $\pm$ 0.243801  | 2890.5 $\pm$ 521.5    |

**Supplementary Table 14:**  $r^2$  and QC errors

|            | $r^2$ | QC 500 nM | QC 100 nM |
|------------|-------|-----------|-----------|
| Peptide 4  | 0.996 | 19.5%     | 9.1%      |
| Peptide 7  | 0.999 | 2.0%      | 10.9%     |
| Peptide 4E | 0.996 | 14.0%     | 18.4%     |
| Tat        | 0.988 | 7.8%      | 17.5%     |

**Supplementary Table 15:** relative target quantity (RQ) minimum and maximum by RT-qPCR

| Target gene     | Compound  | RQ    | RQ Min | RQ Max |
|-----------------|-----------|-------|--------|--------|
| <i>CYR61</i>    | Tat       | 1     | 0.977  | 1.024  |
|                 | Peptide 7 | 3.964 | 3.839  | 4.094  |
| <i>CTGF</i>     | Tat       | 1     | 0.895  | 1.118  |
|                 | Peptide 7 | 1.987 | 1.843  | 2.144  |
| <i>ANKRD1</i>   | Tat       | 1     | 0.893  | 1.120  |
|                 | Peptide 7 | 4.731 | 4.459  | 5.020  |
| <i>SERPINE1</i> | Tat       | 1     | 0.977  | 1.023  |
|                 | Peptide 7 | 3.520 | 3.277  | 3.782  |
| <i>CCNA2</i>    | Tat       | 1     | 0.934  | 1.071  |
|                 | Peptide 7 | 0.934 | 0.810  | 1.078  |

**Supplementary Table 16:** Overview of the synthesized peptides. Peptide analysis by mass spectrometry.

|          | <b>Amino acid sequence</b>                    | <b>N-terminus</b> | <b>Obs. MS</b> | <b>Calc. MS</b>               |
|----------|-----------------------------------------------|-------------------|----------------|-------------------------------|
| 1        | hVGL4(203-256)                                | Ac                | 1988.028       | 1988.010 [M+3H] <sup>3+</sup> |
| b-1      | hVGL4(203-256)                                | Biotin-Peg        | 1573.559       | 1573.544 [M+4H] <sup>4+</sup> |
| 2        | DPVVEEHFRRSLGKNY                              | Ac                | 994.013        | 994.010 [M+2H] <sup>2+</sup>  |
| 3        | KEPEPAPNSVSITG                                | Ac                | 1466.757       | 1466.748 [M+H] <sup>+</sup>   |
| 4        | SVDDHFAKALGDTWLQIKAA                          | Ac                | 1114.082       | 1114.079 [M+2H] <sup>2+</sup> |
|          |                                               | FITC-Peg          | 1360.634       | 1360.632 [M+2H] <sup>2+</sup> |
| 4A       | SVq[DDHFAKALGDTWLQIB]JAA                      | Ac                | 1091.058       | 1091.058 [M+2H] <sup>2+</sup> |
| 4B       | SVq[DDHFAKALGDTWLQIO]JAA                      | Ac                | 1098.061       | 1098.066 [M+2H] <sup>2+</sup> |
| 4C       | SVq[DDHFAKALGDTWLQIK]JAA                      | Ac                | 1105.074       | 1105.074 [M+2H] <sup>2+</sup> |
| 4D       | SVq[EDHFAKALGDTWLQIO]JAA                      | Ac                | 1105.582       | 1105.577 [M+2H] <sup>2+</sup> |
| 4E       | SVq[EDHFAKALGDTWLQIK]JAA                      | Ac                | 1112.093       | 1112.081 [M+2H] <sup>2+</sup> |
|          |                                               | FITC-Peg          | 1358.132       | 1358.131 [M+2H] <sup>2+</sup> |
| 5        | SVDDHFAKALG                                   | Ac                | 1200.600       | 1200.606 [M+H] <sup>1+</sup>  |
| 6        | DTWLQIKAA                                     | Ac                | 1086.597       | 1086.594 [M+2H] <sup>2+</sup> |
| 7        | GRKKRRQRRRPQ-Peg-<br>SVq[EDHFAKALGDTWLQIK]JAA | Ac                | 662.877        | 662.877 [M+6H] <sup>6+</sup>  |
|          |                                               | FITC-Peg          | 744.725        | 744.727 [M+3H] <sup>3+</sup>  |
| 8        | GRKKRRQRRRPQ                                  | Ac                | 832.026        | 832.019 [M+2H] <sup>2+</sup>  |
|          |                                               | FITC-Peg          | 1078.078       | 1078.069 [M+2H] <sup>2+</sup> |
| 4E(open) | SVEDHFAKALGDTWLQIKAA                          | Ac                | 1119.087       | 1119.593 [M+2H] <sup>2+</sup> |
| 9        | SVDDHFAKALGDTWLQIOAA                          | Ac                | 1106.562       | 1106.567 [M+2H] <sup>2+</sup> |
| 10       | SVEDHFAKALGDTWLQIOAA                          | Ac                | 1113.570       | 1113.575 [M+2H] <sup>2+</sup> |
| 11       | SVDDHFAKALGDTWLQIBAA                          | Ac                | 1100.064       | 1100.064 [M+2H] <sup>2+</sup> |
| 12       | SVEDHFAKALGDTWLQIBAA                          | Ac                | 1106.562       | 1106.567 [M+2H] <sup>2+</sup> |
| 13       | SVDDHFAKALGDTWLQIAAA                          | Ac                | 1085.551       | 1085.550 [M+2H] <sup>2+</sup> |
| 14       | AVq[EDHFAKALGDTWLQIK]JAA                      | Ac                | 1104.096       | 1104.084 [M+2H] <sup>2+</sup> |
| 15       | SAq[EDHFAKALGDTWLQIK]JAA                      | Ac                | 1098.077       | 1098.065 [M+2H] <sup>2+</sup> |
| 16       | SVq[EAHFAKALGDTWLQIK]JAA                      | Ac                | 1090.098       | 1090.086 [M+2H] <sup>2+</sup> |
| 17       | SVq[EDAFKALGDTWLQIK]JAA                       | Ac                | 2157.153       | 2157.133 [M+H] <sup>+</sup>   |
| 18       | SVq[EDHAAKALGDTWLQIK]JAA                      | Ac                | 1074.075       | 1074.065 [M+2H] <sup>2+</sup> |
| 19       | SVq[EDHFAAALGDTWLQIK]JAA                      | Ac                | 1083.561       | 1083.552 [M+2H] <sup>2+</sup> |
| 20       | SVq[EDHFAKAAGDTWLQIK]JAA                      | Ac                | 1091.066       | 1091.058 [M+2H] <sup>2+</sup> |
| 21       | SVq[EDHFAKALGATWLQIK]JAA                      | Ac                | 1090.090       | 1090.086 [M+2H] <sup>2+</sup> |
| 22       | SVq[EDHFAKALGDAWLQIK]JAA                      | Ac                | 1097.079       | 1097.076 [M+2H] <sup>2+</sup> |
| 23       | SVq[EDHFAKALGDTALQIK]JAA                      | Ac                | 1054.564       | 1054.561 [M+2H] <sup>2+</sup> |
| 24       | SVq[EDHFAKALGDTWAQIK]JAA                      | Ac                | 1091.061       | 1091.058 [M+2H] <sup>2+</sup> |
| 25       | SVq[EDHFAKALGDTWLAIK]JAA                      | Ac                | 1093.059       | 1093.056 [M+2H] <sup>2+</sup> |
| 26       | SVq[EDHFAKALGDTWLQAK]JAA                      | Ac                | 1091.061       | 1091.058 [M+2H] <sup>2+</sup> |
| 27       | SVq[EDHFAKALGDTWLRIK]JAA                      | FITC-Peg          | 1372.164       | 1372.152 [M+2H] <sup>2+</sup> |
| 28       | SVq[EDHFAKALGDTWLRIK]JRA                      | FITC-Peg          | 1414.688       | 1414.684 [M+2H] <sup>2+</sup> |
| 29       | SVq[EAHFAAALGDTWLRIK]JRR                      | FITC-Peg          | 1406.694       | 1406.692 [M+2H] <sup>2+</sup> |
